# Supplementary material
Source: MDPI journal article supplement (https://www.mdpi.com/2079-6412/14/1/14)
Supplement: s1 [file s1]

# Analysis of Antibacterial and Antiviral Properties of ZnO and Cu Coatings Deposited by Magnetron Sputtering: Evaluation of Cell Viability and ROS Production

Viktors Vibornijs <sup>1,†</sup>, Martins Zubkins <sup>1,†</sup>, Edvards Strods <sup>1</sup>, Zhanna Rudevica <sup>2</sup>,  
Ksenija Korotkaja <sup>2</sup>, Andrejs Ogurcovs <sup>1</sup>, Karlis Kundzins <sup>1</sup>, Juris Purans <sup>1</sup>  
and Anna Zajakina <sup>2,\*</sup>

<sup>1</sup> Institute of Solid State Physics, University of Latvia, Kengaraga 8, LV-1063 Riga, Latvia;

viktors.vibornijs@cfi.lu.lv (V.V.); martins.zubkins@cfi.lu.lv (M.Z.);

edvards.strods@cfi.lu.lv (E.S.);

andrejs.ogurcovs@cfi.lu.lv (A.O.); karlis.kundzins@cfi.lu.lv (K.K.);

juris.purans@cfi.lu.lv (J.P.)

<sup>2</sup> Latvian Biomedical Research and Study Centre (LBMC), Ratsupites 1, LV-1067 Riga, Latvia;

zhanna.rudevica@biomed.lu.lv (Z.R.); ksenija.korotkaja@biomed.lu.lv (K.K.)

\* Correspondence: anna@biomed.lu.lv

† These authors contributed equally to this work.

## Supplementary information

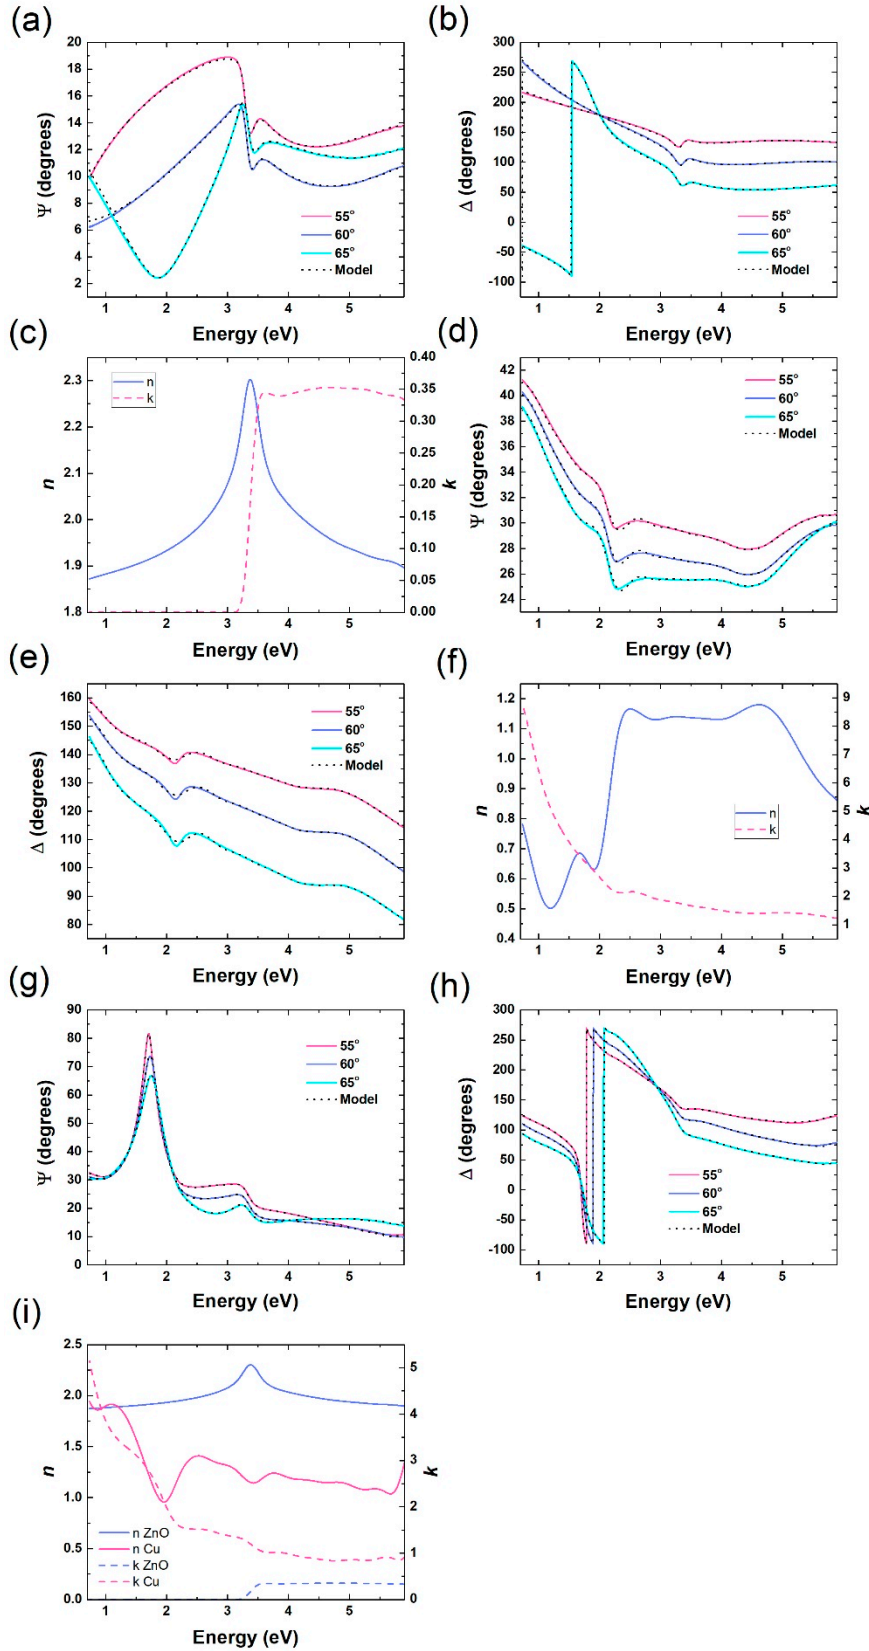

**Figure S1.** Main ellipsometric angles  $\Psi$  and  $\Delta$  (both experimental data and model fits) as a function of photon energy and incident angles, and  $n$ & $k$  curves for (a,b,c) ZnO, (d,e,f) Cu, and (g,h,i) ZnO/Cu/ZnO coatings.
